# Supplementary material for: Intersubband plasmons in the quantum limit in gated and aligned carbon nanotubes
Source: PubMed Central journal article supplement (PMC5856781; doi:10.1038/s41467-018-03381-y), 2018-03-16
Supplement: 41467_2018_3381_MOESM1_ESM.pdf [file 41467_2018_3381_MOESM1_ESM.pdf]

Supplementary Information for  
**Intersubband Plasmons in the Quantum Limit  
in Gated and Aligned Carbon Nanotubes**

Kazuhiro Yanagi,<sup>\*</sup> Ryotaro Okada, Yota Ichinose, Yohei Yomogida,  
Fumiya Katsutani, Weilu Gao, and Junichiro Kono<sup>†</sup>

<sup>\*</sup>yanagi-kazuhiro@tmu.ac.jp, <sup>†</sup>kono@rice.edu

**Supplementary Note 1 Selection Rules for Perpendicular  
Polarized Transitions**

Here we discuss the selection rules for optical transitions in carbon nanotubes for light polarized perpendicular to the nanotube axis, following Supplementary Ref. [1].

**Characteristics of wavefunctions in carbon nanotubes**

Within an effective mass description of electronic states in single-wall carbon nanotubes (SWCNTs), the envelope wavefunction of each state can be expressed as

$$F_{s,n,k}(\mathbf{r}) = \frac{1}{\sqrt{AL}} |s, n, k\rangle \exp(i\kappa_n x + ik y) \quad (1)$$

where

$$|s, n, k\rangle = \frac{1}{\sqrt{2}} \begin{pmatrix} \frac{s(\kappa_n - ik)}{\sqrt{\kappa_n^2 + k^2}} \\ 1 \end{pmatrix}, \quad (2)$$

$\mathbf{r} = (x, y)$ ,  $x$  is the coordinate along the circumference,  $y$  is the coordinate along the nanotube axis,

$$\kappa_n = \frac{2\pi}{L} \left( n - \frac{\nu}{3} \right) \quad (3)$$

is the (quantized) wavenumber along the circumference ( $n = 0, \pm 1, \pm 2, \dots$ ),  $k$  is the wavenumber along the nanotube axis,  $L$  is the length of the circumference,  $A$  is the length of the nanotube,  $s = +1$  ( $-1$ ) for the conduction (valence) band, and  $\nu = N - M \pmod{3}$  for a SWCNT with chirality  $(N, M)$ .

Note that  $\nu = 0$  ( $\pm 1$ ) for a metallic (semiconducting) nanotube. Specifically, in the case of a  $(17, 0)$  nanotube, for which  $\nu = -1$ ,

$$\kappa_n = \frac{2\pi}{L} \left( n + \frac{1}{3} \right), \quad (4)$$

and in the case of a  $(10, 10)$  nanotube, for which  $\nu = 0$ ,

$$\kappa_n = \frac{2\pi}{L} n. \quad (5)$$

Furthermore, the energy of the state  $F_{s,n,k}$  is given by

$$\varepsilon_{s,n}(k) = \frac{3sL}{4\pi} \varepsilon_0 \sqrt{\kappa_n^2 + k^2}, \quad (6)$$

where, as defined in the main text,

$$\varepsilon_0 = \frac{2\gamma_0 a_{\text{C-C}}}{d_t} = \frac{2\pi\gamma_0 a_{\text{C-C}}}{L}, \quad (7)$$

$\gamma_0$  ( $\sim 2.9$  eV) is the the nearest-neighbor transfer integral for graphene,  $a_{\text{C-C}}$  ( $= 0.142$  nm) is the nearest neighbor C-C separation in graphene, and  $d_t$  is the nanotube diameter. For example, the band-edge ( $k = 0$ ) energy of the lowest-lying conduction subband ( $C_{S1}^{n=0}$ ) in a  $\nu = -1$  (semiconducting) carbon nanotube is calculated to be

$$\varepsilon_{1,0}(0) = \frac{3L}{4\pi} \cdot \varepsilon_0 \cdot \frac{2\pi}{L} \cdot \frac{1}{3} = \frac{\varepsilon_0}{2}. \quad (8)$$

At  $k = 0$ , the wavefunction is written as

$$F_{s,n,0} = \frac{1}{\sqrt{AL}} |s, n, 0\rangle \exp(i\kappa_n x) \quad (9)$$

$$= \frac{1}{\sqrt{AL}} \frac{1}{\sqrt{2}} \begin{pmatrix} s \frac{\kappa_n}{|\kappa_n|} \\ 1 \end{pmatrix} \exp(i\kappa_n x). \quad (10)$$

Note that the value of  $s\kappa_n/|\kappa_n|$  is either  $+1$  or  $-1$ , which means that

$$|s, n, 0\rangle = \frac{1}{\sqrt{2}} \begin{pmatrix} 1 \\ 1 \end{pmatrix} \text{ or } \frac{1}{\sqrt{2}} \begin{pmatrix} -1 \\ 1 \end{pmatrix}. \quad (11)$$

Furthermore, one can easily see that these functions are the eigenfunctions of the Pauli matrix

$$\hat{\sigma}_x = \begin{pmatrix} 0 & 1 \\ 1 & 0 \end{pmatrix} \quad (12)$$

with eigenvalue  $\sigma_x = +1$  and  $-1$ , respectively. When the polarization of the incident light is perpendicular to the nanotube axis, the induced current density operator  $\hat{J}_x$  is proportional to  $\hat{\sigma}_x$ , and thus, the conservation of  $\sigma_x$  leads to one of the determining factors for the selection rules, as shown below.

### Selection rules

We confine ourselves to the case where the light field is linearly polarized in a direction perpendicular to the nanotube axis. In this case, the current density induced in the circumferential direction, expressed in operator form, is given by [?]

$$\hat{j}_x^l = -\frac{3eL}{4\pi\hbar}\varepsilon_0\hat{\sigma}_x \exp\left(-i\frac{2\pi l}{L}x\right), \quad (13)$$

where  $l = \pm 1$  correspond to the two circular polarization components of the electric field of light. The optical conductivity, calculated using the Kubo formula [?], is non-zero (i.e., there is finite absorption) only when the following transition matrix element is non-zero between the states  $F_{s,n,k}$  and  $F_{s',n',k}$ :

$$D_{snk,s'n'k} = \int F_{s,n,k}^* \hat{J}_x^l F_{s',n',k} dx \quad (14)$$

$$= -\frac{3e\varepsilon_0}{4\pi\hbar A}(s, n, k | \hat{\sigma}_x | s', n', k) \int e^{i\{(\kappa_{n'} - \kappa_n) - \frac{2\pi l}{L}\}x} dx. \quad (15)$$

Note that we are considering only  $k$ -conserving transitions because the incident light has zero linear momentum along the nanotube axis (i.e., the  $y$  direction). The second factor in Eq. (15) immediately leads to the selection rule

$$\kappa_{n'} - \kappa_n = \frac{2\pi l}{L}. \quad (16)$$

However, since  $\kappa_{n'} - \kappa_n = (2\pi/L)(n' - n)$  for any  $\nu$ , this is equivalent to

$$\Delta n = n' - n = l. \quad (17)$$

Physically, this condition ensures the conservation of angular momentum.

The matrix element  $(s, n, k | \hat{\sigma}_x | s', n', k)$  appearing in Eq. (15) can be exactly evaluated at  $k = 0$  because, as noted earlier,  $|s, n, 0\rangle$  is an eigenfunction of  $\hat{\sigma}_x$  with an eigenvalue  $\sigma_x = s\kappa_n/|\kappa_n| = \pm 1$ :

$$\hat{\sigma}_x \frac{1}{\sqrt{2}} \begin{pmatrix} 1 \\ 1 \end{pmatrix} = \frac{1}{\sqrt{2}} \begin{pmatrix} 1 \\ 1 \end{pmatrix} \quad (18)$$

$$\hat{\sigma}_x \frac{1}{\sqrt{2}} \begin{pmatrix} -1 \\ 1 \end{pmatrix} = -\frac{1}{\sqrt{2}} \begin{pmatrix} -1 \\ 1 \end{pmatrix} \quad (19)$$

$$\frac{1}{\sqrt{2}} \begin{pmatrix} 1 & 1 \end{pmatrix} \cdot \frac{1}{\sqrt{2}} \begin{pmatrix} -1 \\ 1 \end{pmatrix} = 0. \quad (20)$$

Therefore,  $(s, n, 0 | \hat{\sigma}_x | s', n + l, 0)$  is non-zero only when the two states have the same value of  $\sigma_x$ , which is the second selection rule for optical transitions in SWCNTs. This rule is strictly true only when  $k = 0$ .

In summary, for an optical transition to occur in SWCNTs for light polarized perpendicular to the nanotube axis, the following two have to be satisfied:

1.  $\Delta n = \pm 1$ . Namely, the angular momentum quantum number has to change by  $\pm 1$ . Here,  $+1$  ( $-1$ ) corresponds to right (left) circularly polarization.
2.  $\Delta \sigma_x = 0$ . Namely, the eigenvalue of the Pauli matrix  $\hat{\sigma}_x$  has to be conserved. Strictly speaking, this rule applies only at  $k = 0$ .

### Allowed transitions for a (17,0) nanotube

Here, we specifically consider a  $\nu = -1$  nanotube, such as a (17,0) nanotube, which is semiconducting. Supplementary Table 1 summarizes the characteristics of the lowest four subbands in the conduction and valance bands. Here,  $s = \pm 1$  is the band index,  $n$  is the angular momentum quantum number,  $\kappa_n$  is the quantized wavenumber along the circumference [see Eq. (4)],  $\sigma_x = s\kappa_n/|\kappa_n|$ , and  $\varepsilon_{s,n}(0)$  is the band-edge ( $k = 0$ ) energy.

Based on these values of quantum numbers and the selection rules we derived in Supplementary Note 1, we can conclude that the following transitions are possible for a  $\nu = -1$  nanotube:

1. *Intersubband (or intraband)* transitions ( $\Delta s = 0$ ):  $C_{S1} \rightarrow C_{S3}$ ,  $C_{S2} \rightarrow C_{S4}$ ,  $V_{S1} \rightarrow V_{S3}$ , and  $V_{S2} \rightarrow V_{S4}$
2. *Interband* transitions ( $\Delta s = 2$ ):  $V_{S1} \rightarrow C_{S2}$  and  $V_{S2} \rightarrow C_{S1}$

Note that all these six transitions universally occur at  $(3/2)\varepsilon_0$ , as mentioned in the main text.

|          | $s$ | $n$ | $\kappa_n$          | $\sigma_x$ | $\varepsilon_{s,n}(0)$     |          | $s$ | $n$ | $\kappa_n$          | $\sigma_x$ | $\varepsilon_{s,n}(0)$      |
|----------|-----|-----|---------------------|------------|----------------------------|----------|-----|-----|---------------------|------------|-----------------------------|
| $C_{S1}$ | +1  | 0   | $\frac{2\pi}{3L}$   | +1         | $\frac{\varepsilon_0}{2}$  | $V_{S1}$ | -1  | 0   | $\frac{2\pi}{3L}$   | -1         | $-\frac{\varepsilon_0}{2}$  |
| $C_{S2}$ | +1  | -1  | $-\frac{4\pi}{3L}$  | -1         | $\varepsilon_0$            | $V_{S2}$ | -1  | -1  | $-\frac{4\pi}{3L}$  | +1         | $-\varepsilon_0$            |
| $C_{S3}$ | +1  | +1  | $\frac{8\pi}{3L}$   | +1         | $2\varepsilon_0$           | $V_{S3}$ | -1  | +1  | $\frac{8\pi}{3L}$   | -1         | $-2\varepsilon_0$           |
| $C_{S4}$ | +1  | -2  | $-\frac{10\pi}{3L}$ | -1         | $\frac{5}{2}\varepsilon_0$ | $V_{S4}$ | -1  | -2  | $-\frac{10\pi}{3L}$ | +1         | $-\frac{5}{2}\varepsilon_0$ |

Supplementary Table 1: The characteristics of the lowest four subbands in the conduction and valance bands in a (17,0) carbon nanotube.

### Allowed transitions for a (10,10) nanotube

Here, we specifically consider a  $\nu = 0$  nanotube, such as a (10,10) nanotube, which is metallic. Supplementary Table 2 summarizes the characteristics of the lowest-lying subbands in the conduction and valance bands. Here,  $s = \pm 1$  is the band index,  $n$  is the angular momentum quantum number,  $\kappa_n$  is the quantized wavenumber along the circumference [see Eq. (5)],  $\sigma_x = s\kappa_n/|\kappa_n|$ , and  $\varepsilon_{s,n}(0)$  is the band-edge ( $k = 0$ ) energy. It should be noted that the lowest subbands in metallic tubes,  $C_{M0}$  and  $V_{M0}$ , are exceptional in the sense that their wavefunctions are eigenfunctions of  $\hat{\sigma}_y$ , rather than  $\hat{\sigma}_x$ .

Based on these values of quantum numbers and the selection rules we derived in Supplementary Note 1, we can conclude that the following transitions are possible for a  $\nu = 0$  nanotube:

1. *Intersubband (or intraband) transitions* ( $\Delta s = 0$ ):  $C_{M1}^{n=+1} \rightarrow C_{M2}^{n=+2}$ ,  $C_{M1}^{n=-1} \rightarrow C_{M2}^{n=-2}$ ,  $V_{M1}^{n=+1} \rightarrow V_{M2}^{n=+2}$ , and  $V_{S2}^{n=-1} \rightarrow V_{S4}^{n=-2}$ . Again, all these transitions universally occur at  $(3/2)\varepsilon_0$ .
2. *Interband transitions* ( $\Delta s = 2$ ):  $V_{M1} \rightarrow C_{M2}$  and  $V_{M2} \rightarrow C_{M1}$ . These transitions occur at  $(9/2)\varepsilon_0$ .

|          | $s$ | $n$     | $\kappa_n$           | $\sigma_x$ | $\varepsilon_{s,n}(0)$     |          | $s$ | $n$     | $\kappa_n$           | $\sigma_x$ | $\varepsilon_{s,n}(0)$      |
|----------|-----|---------|----------------------|------------|----------------------------|----------|-----|---------|----------------------|------------|-----------------------------|
| $C_{M0}$ | +1  | 0       | 0                    | N/A        | 0                          | $V_{M0}$ | -1  | 0       | 0                    | N/A        | 0                           |
| $C_{M1}$ | +1  | $\pm 1$ | $\pm \frac{2\pi}{L}$ | $\pm 1$    | $\frac{3}{2}\varepsilon_0$ | $V_{M1}$ | -1  | $\pm 1$ | $\pm \frac{2\pi}{L}$ | $\mp 1$    | $-\frac{3}{2}\varepsilon_0$ |
| $C_{M2}$ | +1  | $\pm 2$ | $\pm \frac{4\pi}{L}$ | $\pm 1$    | $3\varepsilon_0$           | $V_{M2}$ | -1  | $\pm 2$ | $\pm \frac{4\pi}{L}$ | $\mp 1$    | $-3\varepsilon_0$           |

Supplementary Table 2: The characteristics of the lowest four subbands in the conduction and valance bands in a (10,10) carbon nanotube.

## Supplementary Note 2 Additional Experimental Data

### Detailed gate-voltage dependence of the ISBP peak

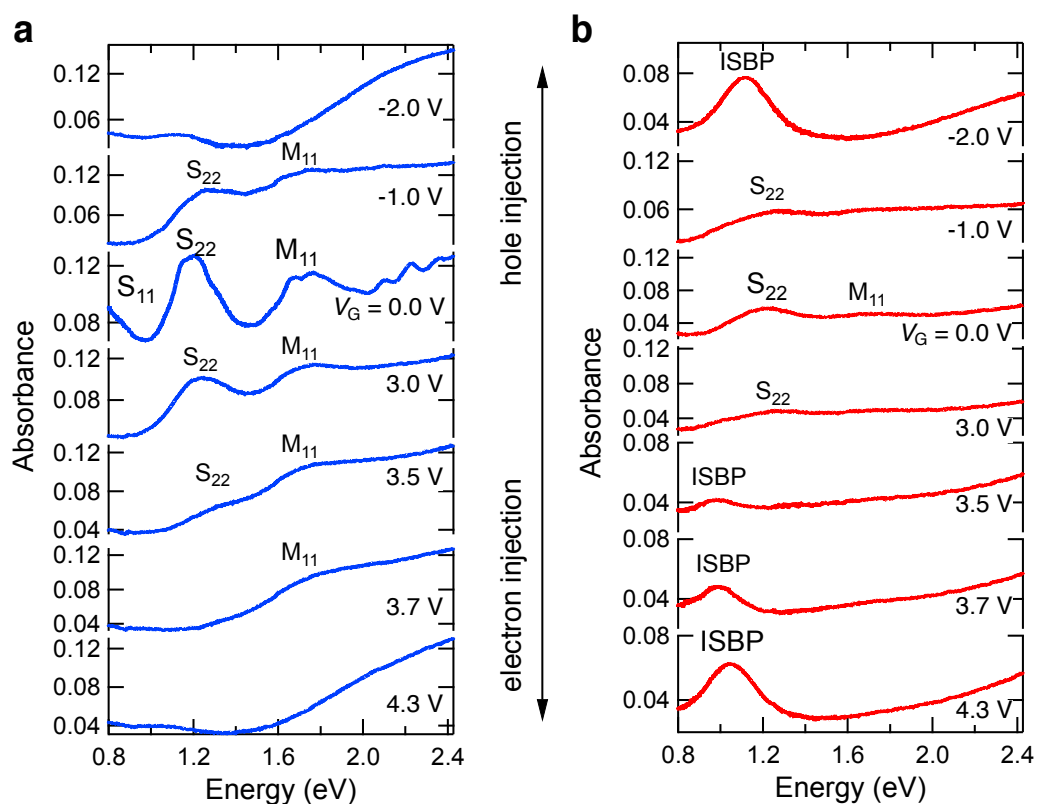

Supplementary Figure 1: **Appearance of the intersubband plasmon (ISBP) peak in a gated and aligned carbon nanotube film in polarized absorption spectra.** **a**, Parallel-polarization and **b**, perpendicular-polarization optical absorption spectra at various gate voltages for an aligned single-wall carbon nanotube film containing semiconducting and metallic nanotubes with an average diameter of 1.4 nm.

## Gate-voltage-dependent linear dichroism spectra

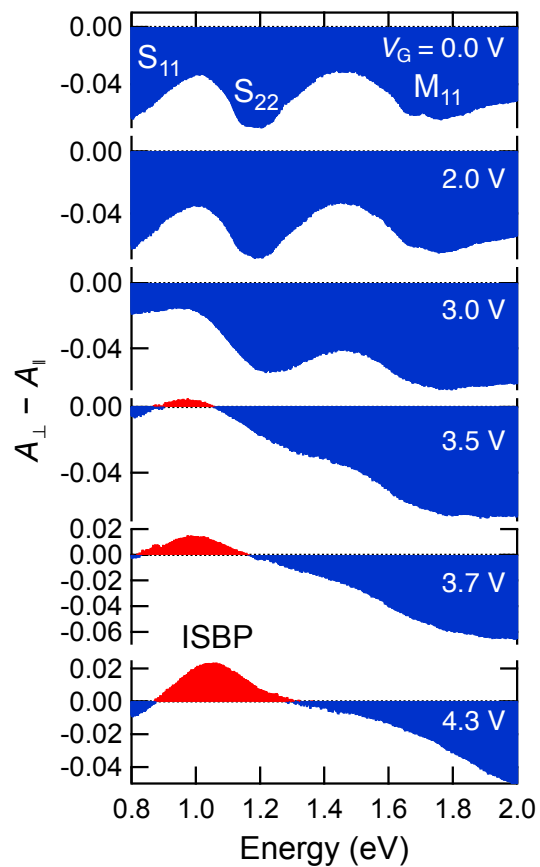

Supplementary Figure 2: **Linear dichroism spectra for a film of aligned unsorted SWCNTs with an average diameter of 1.4 nm.** Red and blue parts indicate positive (perpendicular polarization absorption being stronger) and negative (parallel polarization absorption being stronger) regions, respectively.

### Spectra for metal- and semiconductor-enriched films

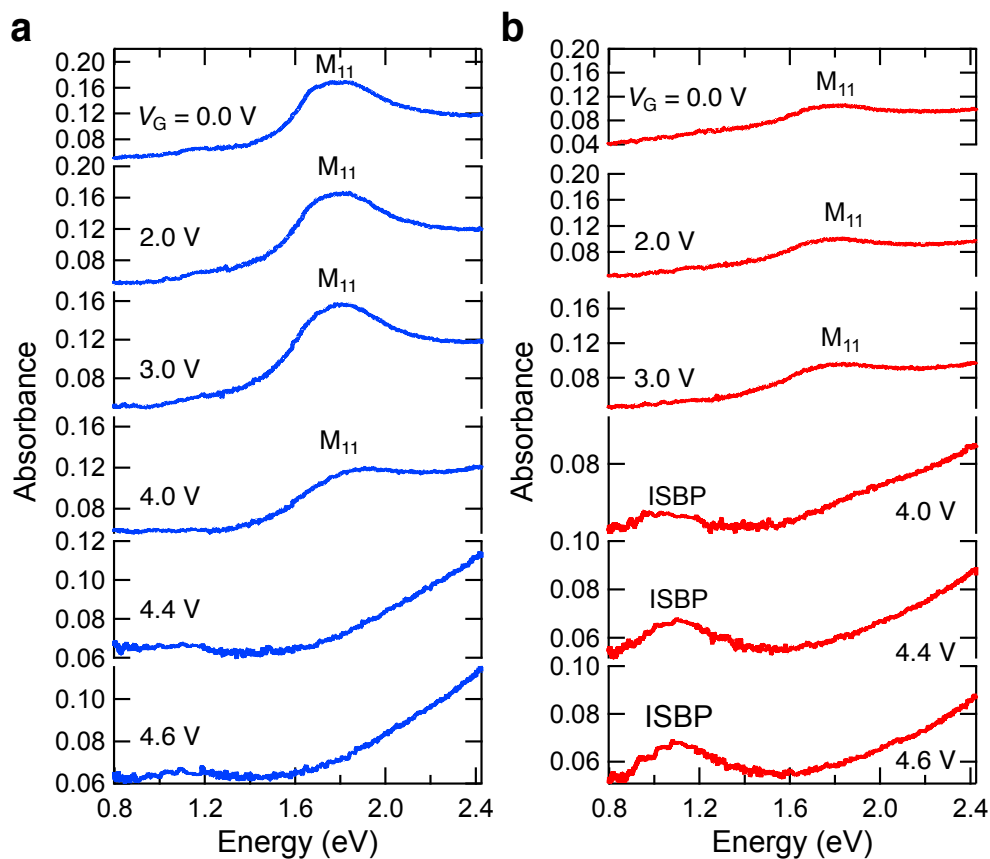

Supplementary Figure 3: **Polarization-dependent absorbance spectra for an aligned metallic SWCNT film at various gated voltages.** **a**, Parallel (blue lines) and **b**, perpendicular (red lines) polarization optical absorption for an aligned metallic SWCNT film with an average diameter of 1.4 nm at various values of gate voltage,  $V_G$ .



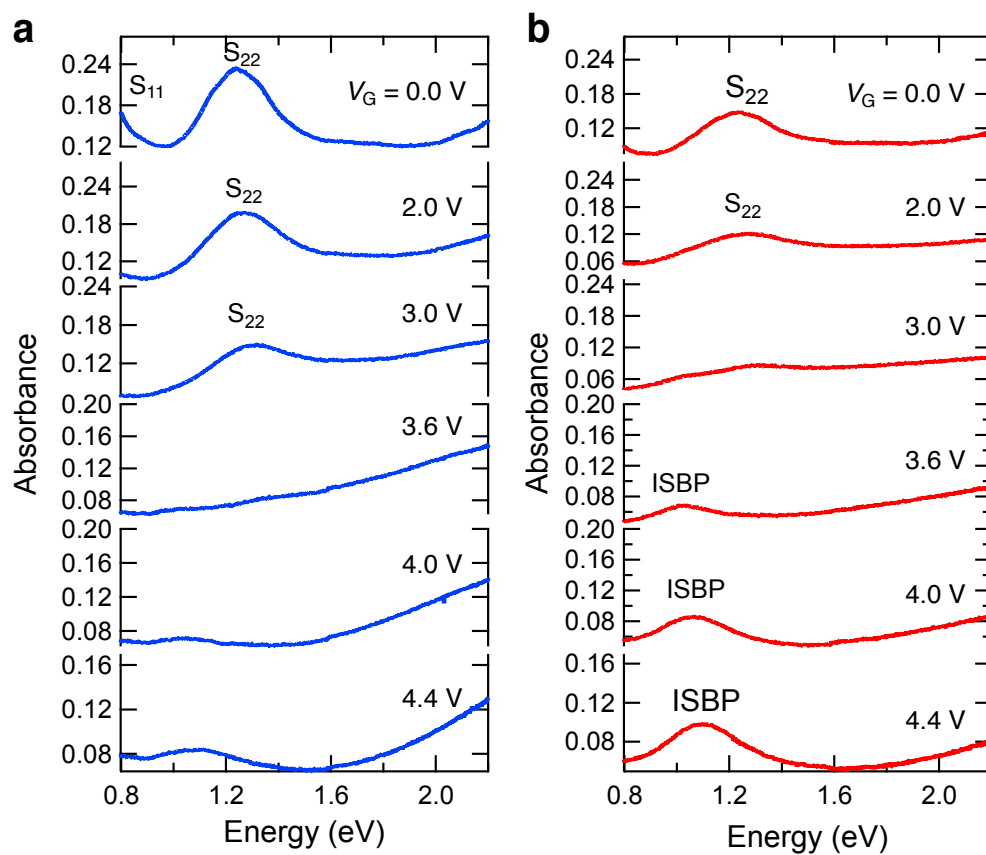

Supplementary Figure 4: **Polarization-dependent absorbance spectra for an aligned semiconducting SWCNT film at various gated voltages.** **a**, Parallel (blue lines) and **b**, perpendicular (red lines) polarization optical absorption for an aligned semiconducting SWCNT film with an average diameter of 1.4 nm at various values of gate voltage,  $V_G$ .

### Supplementary Note 3 Calculations of Absorption Spectra

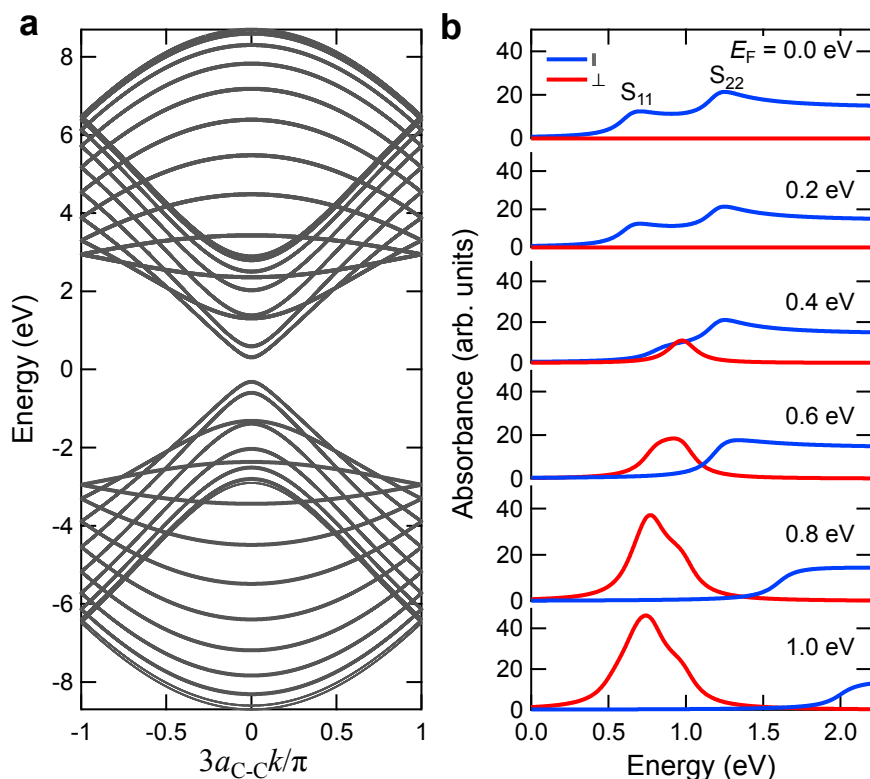

Supplementary Figure 5: **Calculated single-particle electronic band structure and absorbance spectra for a (17,0) SWCNT.** **a**, Band structure of a (17,0) SWCNT calculated using a tight-binding method with  $\gamma_0 = 2.9$  eV. **b**, Calculated perpendicular (red line) and parallel polarization (blue line) optical absorbance spectra for a (17,0) SWCNT at various values of Fermi energy  $E_F$  based on Equation (2) in the main text.

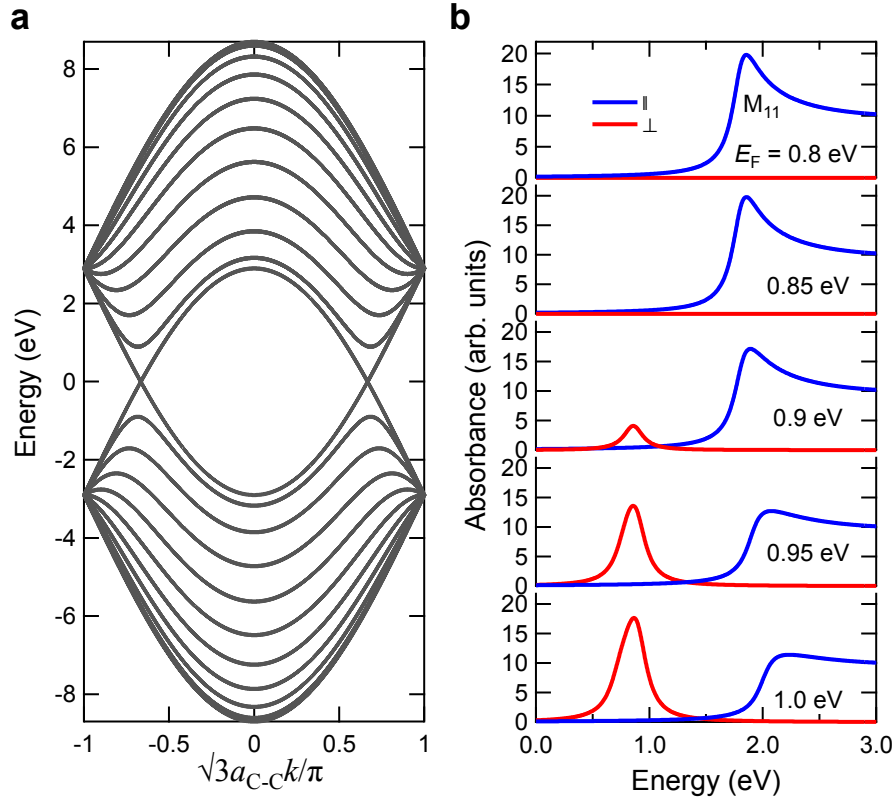

Supplementary Figure 6: **Calculated single-particle electronic band structure and absorbance spectra for a (10,10) SWCNT.** **a**, Band structure of a (10,10) SWCNT calculated using a tight-binding method with  $\gamma_0 = 2.9$  eV. **b**, Calculated perpendicular (red line) and parallel polarization (blue line) optical absorption spectra for a (10,10) SWCNT at various values of Fermi energy  $E_F$  based on Equation (2) in the main text.

## Supplementary Note 4 Drude Plasmon Model for SWCNTs

Based on the classical Drude model of plasmons, the perpendicular-polarization optical absorption in a doped SWCNT can be written as [2]

$$A_p(\omega) = C \text{Im} \left\{ \frac{\omega_g}{4\pi\omega_g^2 - \omega(\omega + i\tau^{-1})} \right\}, \quad (21)$$

where  $C$  is a constant,  $\omega_g = (e/\hbar)(E_F/\pi d_t)^{1/2}$ ,  $E_F$  is the Fermi energy,  $d_t$  is the nanotube diameter, and  $\tau$  is a relaxation time.  $d_t$  was set to be 1.4 nm, and  $\hbar/\tau$  was set to be 0.1 eV for our calculation. Note that the equations and quantities are expressed in atomic units, and we need to use  $e^2/(\hbar c) \simeq 1/137$  to rewrite them in SI units. Thus, the resonance energy,  $\hbar\omega_p$ , at which the peak of  $A_p$  occurs, is given by  $2(\hbar c E_F/137 d_t)^{1/2}$  as written in the main text.

## Supplementary References

1. T. Ando, "Theory of Electronic States and Transport in Carbon Nanotubes," *J. Phys. Soc. Jpn.* **74**, 777 (2005).
2. F. J. García de Abajo, "Graphene Plasmonics: Challenges and Opportunities," *ACS Photonics* **1**, 135 (2014).
